# Supplementary material
Source: MDPI journal article supplement (https://www.mdpi.com/2072-4292/14/20/5249)
Supplement: s1 [file s1 › remotesensing-1950299-supplementary.pdf]

# Supplementary Materials

*Article*

## Comparing Sentinel-2 and Landsat 8 for Burn Severity Mapping in Western North America

Alexander A. Howe <sup>1,\*</sup>, Sean A. Parks <sup>2</sup>, Brian J. Harvey <sup>3</sup>, Saba J. Saberi <sup>4</sup>, James A. Lutz <sup>1</sup>  
and Larissa L. Yocom <sup>1</sup>

<sup>1</sup> S.J. & Jessie E. Quinney College of Natural Resources, Utah State University, Logan, UT 84322, USA

<sup>2</sup> USDA Forest Service Aldo Leopold Wilderness Research Institute, Rocky Mountain Research Station, US Forest Service, Missoula, MT 59801, USA;

<sup>3</sup> School of Environmental and Forest Sciences, University of Washington, Seattle, WA 98195, USA

<sup>4</sup> Department of Environmental Science and Policy, University of California, Davis, CA 95616, USA

\* Correspondence: alex.howe@usu.edu; Tel.: +1-319-331-2984A

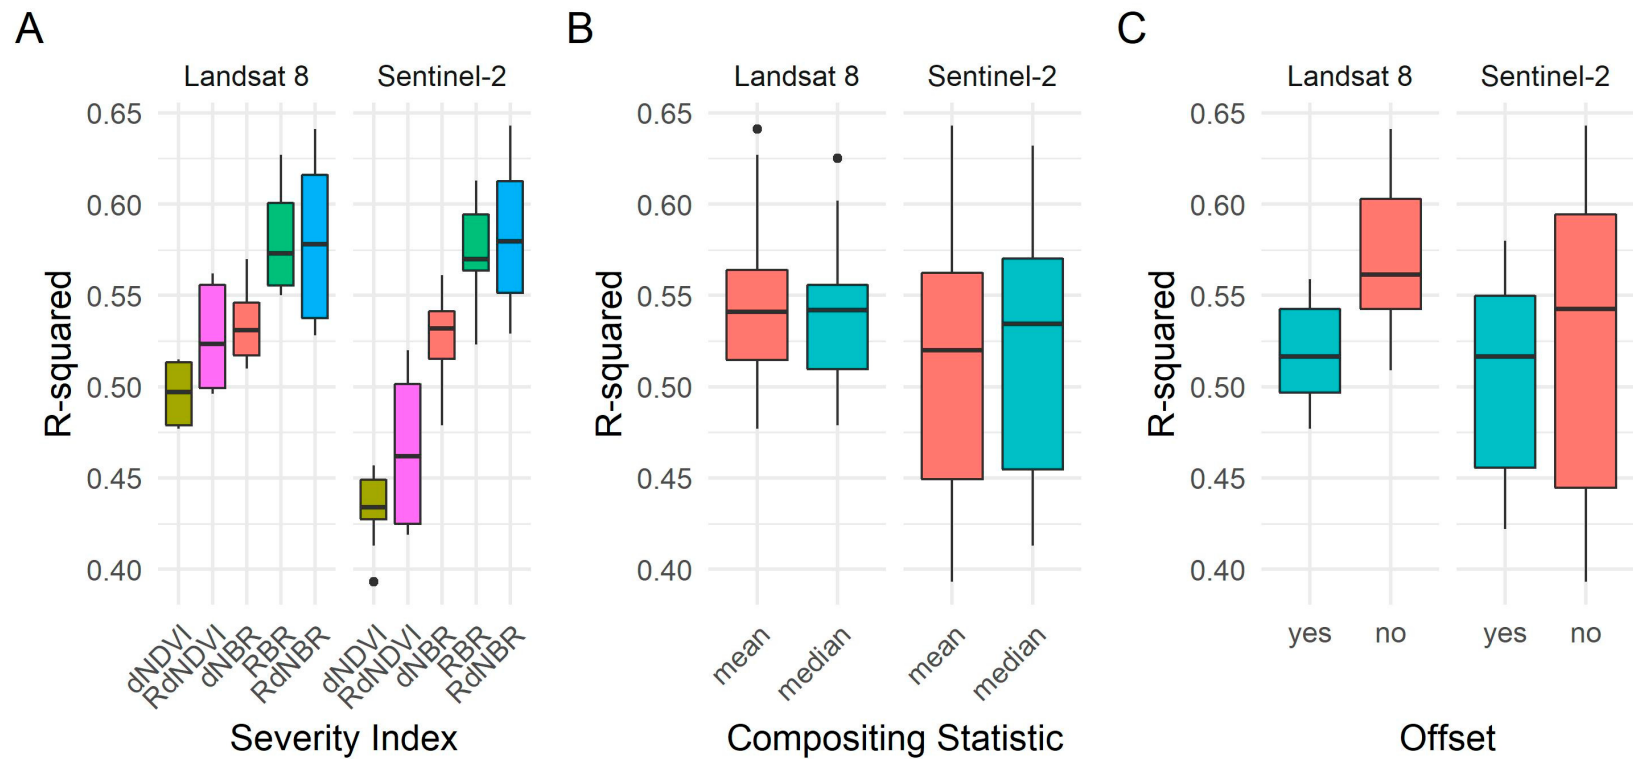

**Figure S1.** NLS model fits ( $R^2$ ) for Landsat 8 and Sentinel-2 derived burn severity indices to field-based Composite Burn Index scores using the image compositing approach.  $N = 40$  models for Landsat and for Sentinel (5 indices  $\times$  2 compositing statistics  $\times$  2 calculation or not of an offset  $\times$  2 composite imagery seasons). The 5 indices compared are 1) dNDVI (differenced Normalized Vegetation Index); 2) RdNDVI (Relativized difference Normalized Vegetation Index); 3) dNBR (differenced Normalized Burn Ratio); 4) RBR (Relativized Burn Ratio); and 5) RdNBR (Relativized differenced Normalized Burn Ratio) (A). The compositing statistics are the method used to calculate the pixel value from the pre- and post-fire imagery stacks in Google Earth Engine (B). The offset calculates the mean index value from a 180-m band outside the fire perimeter for the pre- and post-fire image composites and uses the difference between the two as a correction value for all pixels inside the burn perimeter (C).

**Table S1.** Paired-scene approach scene acquisition dates.

| Map ID | MTBS Fire_ID*         | Fire Name      | Ignition Date | Pre-Fire Image Acquisition Date |            | Post-Fire Image Acquisition Date |            |
|--------|-----------------------|----------------|---------------|---------------------------------|------------|----------------------------------|------------|
|        |                       |                |               | Landsat 8*                      | Sentinel-2 | Landsat 8*                       | Sentinel-2 |
| 1      | WA4782412342420160726 | Hayes Two      | 7/26/2016     | 7/29/2014                       | 6/30/2016  | 8/22/2017                        | 8/4/2017   |
| 2      | WA4695112137420170812 | Norse Peak     | 8/12/2017     | 9/13/2016                       | 8/16/2016  | 9/3/2018                         | 9/5/2018   |
| 3      | WA4691112095020160910 | Rock Creek     | 9/10/2016     | 7/2/2015                        | 8/16/2016  | 6/21/2017                        | 8/11/2017  |
| 4      | WA4737712101920170812 | Jolly Mountain | 8/12/2017     | 7/23/2017                       | 8/11/2017  | 7/26/2018                        | 8/1/2018   |
| 5      | OR4400312257520170811 | Jones          | 8/11/2017     | 7/27/2016                       | 7/27/2016  | 7/17/2018                        | 7/17/2018  |
| 6      | OR4400912217020170804 | Rebel          | 8/4/2017      | 7/23/2017                       | 7/22/2017  | 7/26/2018                        | 7/27/2018  |
| 7      | OR4425712174320170811 | Milli 0843 CS  | 8/11/2017     | 7/23/2017                       | 7/22/2017  | 7/26/2018                        | 7/27/2018  |
| 8      | OR4440811838320160731 | Rail           | 7/31/2016     | 6/20/2016                       | 6/21/2016  | 7/9/2017                         | 7/9/2017   |
| 9      | ID4395011576220160718 | Pioneer        | 7/18/2016     | 8/23/2015                       | 9/22/2015  | 7/11/2017                        | 7/23/2017  |
| 10     | ABC002                | Kenow          | 9/3/2017      | 7/24/2016                       | 7/21/2016  | 7/21/2018                        | 7/18/2018  |
| 11     | MT4667411426820170715 | Lolo Peak      | 7/15/2017     | 7/24/2016                       | 8/17/2016  | 7/30/2018                        | 8/12/2018  |
| 12     | MT4713911378020170715 | Liberty        | 7/15/2017     | 7/24/2016                       | 8/17/2016  | 7/14/2018                        | 7/13/2018  |
| 13     | MT4726811348520170724 | Rice Ridge     | 7/24/2017     | 7/24/2016                       | 8/17/2016  | 7/30/2018                        | 8/2/2018   |
| 14     | MT4599511358020170714 | Meyers         | 7/14/2017     | 8/2/2016                        | 7/3/2017   | 7/23/2018                        | 7/23/2018  |
| 15     | WY4474311097820160809 | Maple          | 8/9/2016      | 8/2/2015                        | 8/4/2016   | 7/22/2017                        | 8/4/2017   |
| 16     | WY4402111078620160725 | Berry          | 7/25/2016     | 7/19/2016                       | 7/15/2016  | 7/22/2017                        | 8/26/2017  |
| 17     | SD4377610344820171211 | Legion Lake    | 12/11/2017    | 6/1/2017                        | 6/1/2017   | 6/4/2018                         | 6/3/2018   |
| 18     | UT3987211174320180824 | Bald Mountain  | 8/24/2018     | 6/7/2018                        | 8/6/2018   | 6/26/2019                        | 8/16/2019  |
| 19     | UT_Mammoth            | Mammoth        | 7/23/2019     | 8/18/2015                       | 8/6/2018   | 7/14/2020                        | 7/1/2020   |
| 20     | UT3935811121620180607 | Trail Mountain | 6/7/2018      | 8/16/2017                       | 6/27/2017  | 7/21/2019                        | 7/22/2019  |
| 21     | UT3828311251320190618 | Skull Flat     | 6/18/2019     | 8/10/2018                       | 6/27/2018  | 7/30/2020                        | 7/11/2020  |
| 22     | UT3829911250120191002 | Skull Flat 2   | 10/2/2019     | 8/13/2019                       | 6/27/2018  | 7/14/2020                        | 7/11/2020  |
| 23     | UT3771811283720170617 | Brianhead      | 6/17/2017     | 9/19/2015                       | 9/19/2015  | 9/11/2018                        | 9/10/2018  |
| 24     | UT3758811232020190726 | Little Bear    | 7/26/2019     | 8/10/2018                       | 7/17/2019  | 8/15/2020                        | 7/1/2020   |
| 25     | UT_Chippean           | Chippean       | 8/6/2019      | 6/28/2019                       | 6/24/2019  | 6/30/2020                        | 6/28/2020  |
| 26     | AZ3626611202520160629 | Fuller         | 6/29/2016     | 7/10/2015                       | 6/12/2016  | 7/15/2017                        | 6/27/2017  |

\*All Landsat 8 dates were selected based on those used by MTBS except for Mammoth (19) and Chippean (25) which were smaller than the 1000 ac size threshold MTBS uses to select fires for mapping burn severity in the western US, and Kenow (10), which occurred in Canada and was not mapped by the MTBS program.
